# Supplementary material for: Association of cardiovascular structure and function with cerebrovascular changes and cognitive function in older patients with end-stage renal disease
Source: publisher site journal article supplement (doi:10.18632/aging.102696), 2020-01-07
Supplement: Supplementary file [file aging-v12i2-102696-supplementary-material-SD1.pdf]

## SUPPLEMENTARY TABLES

**Supplementary Table 1. Determinants of pulse-wave velocity.**

|                                                            | Better cardiovascular function              | Worse cardiovascular function            | p-value |
|------------------------------------------------------------|---------------------------------------------|------------------------------------------|---------|
|                                                            | Pulse wave velocity $\leq 10$ m/s<br>n = 45 | Pulse wave velocity $> 10$ m/s<br>n = 38 |         |
| <i>Pulse wave velocity (m/s), mean <math>\pm</math> SD</i> | 7.8 $\pm$ 1.4                               | 14.1 $\pm$ 3.8                           |         |
| Male gender, n (%)                                         | 33 (73.3)                                   | 22 (57.9)                                | 0.138   |
| Age, years; mean $\pm$ SD                                  | 73.0 $\pm$ 6.4                              | 78.4 $\pm$ 6.4                           | <0.0001 |
| Race, Caucasian, n (%)                                     | 40 (88.9)                                   | 34 (89.5)                                | 0.696   |
| Higher educational level, n (%)                            | 15 (33.3)                                   | 15 (39.5)                                | 0.562   |
| Primary kidney disease, n (%)                              |                                             |                                          | 0.652   |
| Non-vascular cause                                         | 16 (35.6)                                   | 14 (36.8)                                |         |
| Vascular cause                                             | 28 (62.2)                                   | 24 (63.2)                                |         |
| <i>Comorbidity, n (%)</i>                                  |                                             |                                          |         |
| Diabetes mellitus                                          | 17 (37.8)                                   | 15 (39.5)                                | 0.874   |
| Peripheral vascular disease                                | 8 (17.8)                                    | 7 (18.4)                                 | 0.940   |
| Cerebral vascular accident                                 | 13 (28.9)                                   | 10 (26.3)                                | 0.794   |
| Heart failure                                              | 3 (6.7)                                     | 3 (7.9)                                  | 0.830   |
| Coronary heart disease                                     | 12 (26.7)                                   | 8 (21.1)                                 | 0.551   |
| Atrial fibrillation                                        | 8 (17.8)                                    | 9 (23.7)                                 | 0.506   |
| Alcohol consumption, n (%)                                 | 27 (61.4)                                   | 17 (44.7)                                | 0.132   |
| Current smoking, n (%)                                     | 10 (22.7)                                   | 4 (10.5)                                 | 0.143   |
| History of smoking, n (%)                                  | 26 (76.5)                                   | 22 (66.7)                                | 0.373   |
| <i>Objective measures, mean <math>\pm</math> SD</i>        |                                             |                                          |         |
| eGFR (ml/min/1.73m <sup>2</sup> )                          | 16.2 $\pm$ 4.5                              | 15.4 $\pm$ 3.8                           | 0.393   |
| Urea (mg/dL)                                               | 20.3 $\pm$ 5.6                              | 22.5 $\pm$ 7.1                           | 0.134   |
| Phosphate (mmol/L)                                         | 1.31 $\pm$ 0.30                             | 1.33 $\pm$ 0.28                          | 0.800   |
| Albuminuria (mg/24 hours)                                  | 815 $\pm$ 900                               | 712 $\pm$ 874                            | 0.683   |
| Troponin (ng/L)                                            | 0.056 $\pm$ 0.083                           | 0.048 $\pm$ 0.053                        | 0.715   |
| NT-proBNP (ng/L)                                           | 1054 $\pm$ 1386                             | 707 $\pm$ 985                            | 0.691   |
| Blood pressure (mmHg)                                      |                                             |                                          |         |
| Systolic                                                   | 149.2 $\pm$ 22.9                            | 151.9 $\pm$ 21.9                         | 0.601   |
| Diastolic                                                  | 82.8 $\pm$ 10.2                             | 80.2 $\pm$ 13.7                          | 0.342   |
| Ejection fraction (%)                                      | 58.5 $\pm$ 10.9                             | 59.4 $\pm$ 9.8                           | 0.686   |
| Cardiac index (l/min/m <sup>2</sup> )                      | 2.6 $\pm$ 0.6                               | 2.6 $\pm$ 0.4                            | 0.652   |

P-values are assessed using an independent t-test, Mann-Whitney U test or chi-square test. Abbreviations: eGFR, estimated glomerular filtration rate; NT-proBNP, N-terminal pro b-type natriuretic peptide; SD, standard deviation;

**Supplementary Table 2. Determinants of ejection fraction.**

|                                         | <b>Better cardiovascular function</b>   | <b>Worse cardiovascular function</b>    | <b>p-value</b> |
|-----------------------------------------|-----------------------------------------|-----------------------------------------|----------------|
|                                         | <b>Ejection fraction &gt;50% n = 65</b> | <b>Ejection fraction &lt;50% n = 19</b> |                |
| <i>Ejection fraction (%), mean ± SD</i> | 63.2 ± 6.2                              | 42.3 ± 7.3                              |                |
| Male gender, n (%)                      | 40 (61.5)                               | 15 (78.9)                               | 0.160          |
| Age, years; mean ± SD                   | 75.4 ± 6.8                              | 76.6 ± 7.5                              | 0.471          |
| Race, Caucasian, n (%)                  | 55 (84.6)                               | 19 (100.0)                              | 0.506          |
| Higher educational level, n (%)         | 21 (32.3)                               | 10 (52.6)                               | 0.106          |
| Primary kidney disease, n (%)           |                                         |                                         | 0.860          |
| Non-vascular cause                      | 23 (35.4)                               | 7 (36.8)                                |                |
| Vascular cause                          | 41 (63.1)                               | 12 (63.2)                               |                |
| <i>Comorbidity, n (%)</i>               |                                         |                                         |                |
| Diabetes mellitus                       | 27 (41.5)                               | 5 (26.3)                                | 0.229          |
| Peripheral vascular disease             | 10 (15.4)                               | 6 (31.6)                                | 0.114          |
| Cerebral vascular accident              | 14 (21.5)                               | 8 (42.1)                                | 0.073          |
| Heart failure                           | 3 (4.6)                                 | 4 (21.1)                                | 0.023          |
| Coronary heart disease                  | 15 (23.1)                               | 6 (31.6)                                | 0.452          |
| Atrial fibrillation                     | 12 (18.5)                               | 6 (31.6)                                | 0.220          |
| Alcohol consumption, n (%)              | 32 (50.0)                               | 13 (68.4)                               | 0.157          |
| Current smoking, n (%)                  | 3 (15.8)                                | 11 (17.2)                               | 0.886          |
| History of smoking, n (%)               | 33 (63.5)                               | 16 (100.0)                              | 0.004          |
| <i>Objective measures, mean ± SD</i>    |                                         |                                         |                |
| eGFR (ml/min/1.73m <sup>2</sup> )       | 16.0 ± 4.4                              | 14.9 ± 3.4                              | 0.303          |
| Urea (mg/dL)                            | 21.2 ± 6.3                              | 21.7 ± 6.7                              | 0.763          |
| Phosphate (mmol/L)                      | 1.31 ± 0.30                             | 1.40 ± 0.23                             | 0.243          |
| Albuminuria (mg/24 hours)               | 754 ± 849                               | 893 ± 1101                              | 0.674          |
| Troponin (ng/L)                         | 0.050 ± 0.077                           | 0.060 ± 0.032                           | 0.008          |
| NT-proBNP (ng/L)                        | 572 ± 915                               | 2020 ± 1482                             | <0.0001        |
| Blood pressure (mmHg)                   |                                         |                                         |                |
| Systolic                                | 151.3 ± 22.3                            | 148.0 ± 22.3                            | 0.588          |
| Diastolic                               | 80.1 ± 11.7                             | 85.8 ± 12.1                             | 0.103          |
| Pulse wave velocity (m/s)               | 10.5 ± 4.1                              | 11.3 ± 4.8                              | 0.447          |
| Cardiac index (l/min/m <sup>2</sup> )   | 2.6 ± 0.7                               | 2.5 ± 0.7                               | 0.498          |

P-values are assessed using an independent t-test, Mann-Whitney U test or chi-square test. Abbreviations: eGFR, estimated glomerular filtration rate; NT-proBNP, N-terminal pro b-type natriuretic peptide; SD, standard deviation;

**Supplementary Table 3. Determinants of cardiac Index.**

|                                                       | Better cardiovascular function                    | Worse cardiovascular function                     | p-value |
|-------------------------------------------------------|---------------------------------------------------|---------------------------------------------------|---------|
|                                                       | Cardiac index >2.2 l/min/m <sup>2</sup><br>n = 56 | Cardiac index ≤2.2 l/min/m <sup>2</sup><br>n = 27 |         |
| <i>Cardiac index (l/min/m<sup>2</sup>), mean ± SD</i> | 2.9 ± 0.5                                         | 1.9 ± 0.3                                         |         |
| Male gender, n (%)                                    | 39 (69.6)                                         | 16 (59.3)                                         | 0.349   |
| Age, years; mean ± SD                                 | 75.4 ± 6.4                                        | 76.2 ± 7.7                                        | 0.675   |
| Race, Caucasian, n (%)                                | 48 (85.7)                                         | 26 (96.3)                                         | 0.373   |
| Higher educational level, n (%)                       | 21 (37.5)                                         | 10 (37.0)                                         | 0.967   |
| Primary kidney disease, n (%)                         |                                                   |                                                   | 0.690   |
| Non-vascular cause                                    | 19 (33.9)                                         | 10 (38.5)                                         |         |
| Vascular cause                                        | 37 (66.1)                                         | 16 (61.5)                                         |         |
| <i>Comorbidity, n (%)</i>                             |                                                   |                                                   |         |
| Diabetes mellitus                                     | 23 (41.1)                                         | 9 (33.3)                                          | 0.497   |
| Peripheral vascular disease                           | 13 (23.2)                                         | 3 (11.1)                                          | 0.190   |
| Cerebral vascular accident                            | 16 (28.6)                                         | 7 (25.9)                                          | 0.801   |
| Heart failure                                         | 3 (5.4)                                           | 4 (14.8)                                          | 0.146   |
| Coronary heart disease                                | 14 (25.0)                                         | 7 (25.9)                                          | 0.928   |
| Atrial fibrillation                                   | 9 (16.1)                                          | 9 (33.3)                                          | 0.074   |
| Alcohol consumption, n (%)                            | 29 (52.7)                                         | 15 (55.6)                                         | 0.809   |
| Current smoking, n (%)                                | 8 (14.5)                                          | 5 (18.5)                                          | 0.643   |
| History of smoking, n (%)                             | 32 (69.6)                                         | 17 (77.3)                                         | 0.508   |
| <i>Objective measures, mean ± SD</i>                  |                                                   |                                                   |         |
| eGFR (ml/min/1.73m <sup>2</sup> )                     | 15.3 ± 4.0                                        | 17.0 ± 4.4                                        | 0.077   |
| Urea (mg/dL)                                          | 21.4 ± 6.2                                        | 21.3 ± 6.8                                        | 0.972   |
| Phosphate (mmol/L)                                    | 1.33 ± 0.31                                       | 1.32 ± 0.25                                       | 0.925   |
| Albuminuria (mg/24 hours)                             | 744 ± 754                                         | 836 ± 1160                                        | 0.737   |
| Troponin (ng/L)                                       | 0.049 ± 0.048                                     | 0.038 ± 0.031                                     | 0.751   |
| NT-proBNP (ng/L)                                      | 944 ± 1208                                        | 799 ± 1266                                        | 0.308   |
| Blood pressure (mmHg)                                 |                                                   |                                                   |         |
| Systolic                                              | 149.5 ± 20.4                                      | 153.0 ± 26.6                                      | 0.516   |
| Diastolic                                             | 80.0 ± 12.8                                       | 84.6 ± 9.0                                        | 0.110   |
| Pulse wave velocity (m/s)                             | 10.4 ± 3.9                                        | 11.2 ± 4.8                                        | 0.417   |
| Ejection fraction (%)                                 | 59.6 ± 10.2                                       | 56.0 ± 12.5                                       | 0.168   |

P-values are assessed using an independent t-test, Mann-Whitney U test or chi-square test. Abbreviations: eGFR, estimated glomerular filtration rate; NT-proBNP, N-terminal pro b-type natriuretic peptide; SD, standard deviation;

**Supplementary Table 4. univariate associations of blood pressure and pulse pressure with cerebrovascular changes values are beta ± SE.**

|                                | Systolic<br>blood pressure |         | Diastolic<br>blood pressure |         | Pulse<br>Pressure |         |
|--------------------------------|----------------------------|---------|-----------------------------|---------|-------------------|---------|
|                                | beta                       | P-value | beta                        | P-value | beta              | P-value |
| Presence of microbleeds        |                            |         |                             |         |                   |         |
| Non-lobar                      | 0.021±0.01                 | 0.100   | 0.000±0.02                  | 0.999   | 0.023±0.01        | 0.085   |
| Lobar                          | 0.025±0.01                 | 0.033   | 0.023±0.02                  | 0.255   | 0.019±0.01        | 0.103   |
| Presence of lacunar infarction | 0.005±0.01                 | 0.628   | -0.007±0.02                 | 0.701   | 0.008±0.01        | 0.468   |
| Total WMH                      | 0.024±0.04                 | 0.559   | -0.120±0.08                 | 0.120   | 0.066±0.04        | 0.135   |

P-values are assessed using linear or logistic regression models. Lacunes include both gliotic and hemorrhagic parenchymal defects subcortical, in brain stem and basal ganglia. Abbreviations: WMH, white matter hyperintensities.

**Supplementary Table 5. Univariate associations of blood pressure and pulse pressure with cognitive function values are beta ± SE.**

|                                      | Systolic<br>blood pressure |         | Diastolic<br>blood pressure |         | Pulse<br>pressure |         |
|--------------------------------------|----------------------------|---------|-----------------------------|---------|-------------------|---------|
|                                      | beta                       | P-value | beta                        | P-value | beta              | P-value |
| <b>Memory</b>                        |                            |         |                             |         |                   |         |
| 15-WVLT immediate recall             | -0.030±0.05                | 0.564   | 0.124±0.10                  | 0.204   | -0.071±0.05       | 0.189   |
| 15-WVLT delayed recall               | 0.003±0.02                 | 0.842   | 0.044±0.03                  | 0.139   | -0.010±0.02       | 0.548   |
| <b>Executive function</b>            |                            |         |                             |         |                   |         |
| Trail Making Test B (sec)            | 1.134±0.33                 | 0.001   | 0.312±0.68                  | 0.645   | 1.143±0.35        | 0.002   |
| Stroop Color Word Test III (sec)     | 0.575±0.45                 | 0.207   | -1.231±0.87                 | 0.163   | 0.973±0.46        | 0.038   |
| SCWT III corrected for SCWT II (sec) | 0.271±0.43                 | 0.527   | -1.609±0.81                 | 0.051   | 0.754±0.44        | 0.088   |
| <b>Psychomotor speed</b>             |                            |         |                             |         |                   |         |
| LDST (correct in 60 sec)             | -0.066±0.03                | 0.058   | -0.022±0.07                 | 0.741   | -0.066±0.04       | 0.072   |
| Trail Making Test A (sec)            | 0.531±0.20                 | 0.009   | 0.418±0.39                  | 0.287   | 0.438±0.21        | 0.037   |
| Stroop Color Word Test II (sec)      | 0.261±0.16                 | 0.100   | 0.215±0.30                  | 0.472   | 0.221±0.17        | 0.187   |

P-values are assessed using linear regression models. Abbreviations: 15-WVLT, 15-Word Verbal Learning Test; LDST, Letter Digit Substitution Test; SCWT, Stroop Color Word Test.
